# Supplementary material for: Ethephon-Induced Ethylene Enhances Starch Degradation and Sucrose Transport with an Interactive Abscisic Acid-Mediated Manner in Mature Leaves of Oilseed rape (Brassica napus L.)
Source: MDPI journal article supplement (doi:10.3390/plants10081670), 2021-08-13
Supplement: s1 [file s1]

**SUPPLEMENTARY TABLE S1.** Primer sequences used for qRT-PCR analysis.

| Gene    | Accession No.  | Forward sequence (5'-3' ) | Reverse sequence (5'-3' ) |
|---------|----------------|---------------------------|---------------------------|
| Cab     | AY288914       | GGCAGCCCATGGTACGGATC      | CCTCCITCGCTGAAGATCTGT     |
| SAG12   | XM_013821610.2 | AGAGAATACCAAACCAAACCGAA   | GCAACTCCCAAATCTCAGGG      |
| NCED3   | HQ260434       | GGAGTGCTTCTGCTTCCATC      | TTCGAGGTTGACTTGCTCCT      |
| PYR1    | XM_013799169.2 | ACCGCAGACCTACAAGCACT      | CTCTCCCTCTCGAACCTGTG      |
| SnRK2   | LK937699.1     | TGAAGATGAGGCTCGGTTCT      | TGCCATCATATTCCTGACGA      |
| AREB2   | HE616526.1     | TGCCATCATATTCCTGACGA      | CACCTCTTATCCCAGGACCA      |
| MYC2    | XM013880351    | ACCAAACGTCTCGAAAATGG      | TGTCAACGAGCAAGAGGATG      |
| AMY3    | XM_013846160.2 | GGTTACCTCCACCGACAGAA      | G TTCAGACGCCCTCCAAATA     |
| BAM1    | XM_013852497.2 | GAAGGTGGGGCTAAAGGTTC      | GCACGCATGAAATCAGAGAA      |
| SUT1    | XM_013855840.2 | GATCCTGCGGATGAGGATAA      | AAGCAGCTTGTCATCCGAGT      |
| SUT4    | XM_022699588.1 | AAGAAGCTTCCACGTCCAGA      | TCTATGCCATTGCCAACGTA      |
| SWEET11 | XM_013871605.2 | AGGTGACCCTCGATATGCTG      | TCATGTAGCTGTTGCGGAAG      |
| ACTIN   | AF111812       | GATTCCGTTGCCCTGAAGTA      | GCGACCACCTTGATCTTCAT      |
